# Supplementary material for: Exploring the comorbidity mechanism of internet addiction, insomnia, depression, and suicidality among Chinese college students through network analysis
Source: Research Square preprint supplement (doi:10.21203/rs.3.rs-7549655/v1), 2025-10-17
Supplement: Supplementary file 1 [file f4c09ac1115f1f03d7d6bc1c.docx]

Exploring the comorbidity mechanism of internet addiction, insomnia, depression, and suicidality among Chinese college students through network analysis

**Table 1** Spearman correlations result among variables.

| Variable | 1 | 2 | 3 |
| --- | --- | --- | --- |
| 1 Internet addiction scores | 1.000 |  |  |
| 2 Insomnia scores | 0.510** |  |  |
| 3 Depression scores | 0.563** | 0.568** |  |
| 4 Suicide scores | 0.428** | 0.399** | 0.449** |

**Table 2** Content and abbreviation of items for IAT.

| Node | Content | Abbreviation |
| --- | --- | --- |
| IAT1 | How often do you find that you stay online longer than you intended? | Stay online longer than intended |
| IAT2 | How often do you neglect household chores to spend more time online? | Neglect household chores |
| IAT3 | How often do you prefer the excitement of the internet to intimacy with your partner? | Prefer contacting Internet to partner |
| IAT4 | How often do you form new relationships with fellow online users? | Form new relationships online |
| IAT5 | How often do others in your life complain to you about the amount of time you spend online? | Complained about being on the web for very long |
| IAT6 | ow often do your grades or school work suffer because of the amount of time you spend online? | Grades or school work suffer |
| IAT7 | How often do you check your email before something else that you need to do? | Put the Internet before anything else |
| IAT8 | How often does your job performance or productivity suffer because of the internet? | Job performance or productivity suffer |
| IAT9 | How often do you become defensive or secretive when anyone asks you what you do online? | Alert when asked about online |
| IAT10 | How often do you block out disturbing thoughts about your life with soothing thoughts of the internet? | Block out life troubles with the Internet |
| IAT11 | How often do you find yourself anticipating when you will go online again? | Anticipate when going online again |
| IAT12 | How often do you fear that life without the internet would be boring, empty, and joyless? | Life is boring without the Internet |
| IAT13 | How often do you snap, yell, or act annoyed if someone bothers you while you are online? | Annoyed if being bothered while online |
| IAT14 | How often do you lose sleep due to being online? | Lose sleep due to the Internet |
| IAT15 | How often do you feel preoccupied with the internet when offline, or fantasize about being online? | Fantasize about the Internet when off-line |
| IAT16 | How often do you find yourself saying “just a few more minutes” when online? | Lack of self-control when being online |
| IAT17 | How often do you try to cut down the amount of time you spend online and fail? | Fail to cut down the time spend online |
| IAT18 | How often do you try to hide how long you have been online? | Hide the duration time online |
| IAT19 | How often do you choose to spend more time online over going out with others? | Prefer being online to going out with others |
| IAT20 | How often do you feel depressed, moody, or nervous when you are offline, which goes away once you are back online? | Feel in terrible emotion when off-line |

**Note:** IAT, Internet addiction test; IAT1-IAT20 represents 20 items of IAT.


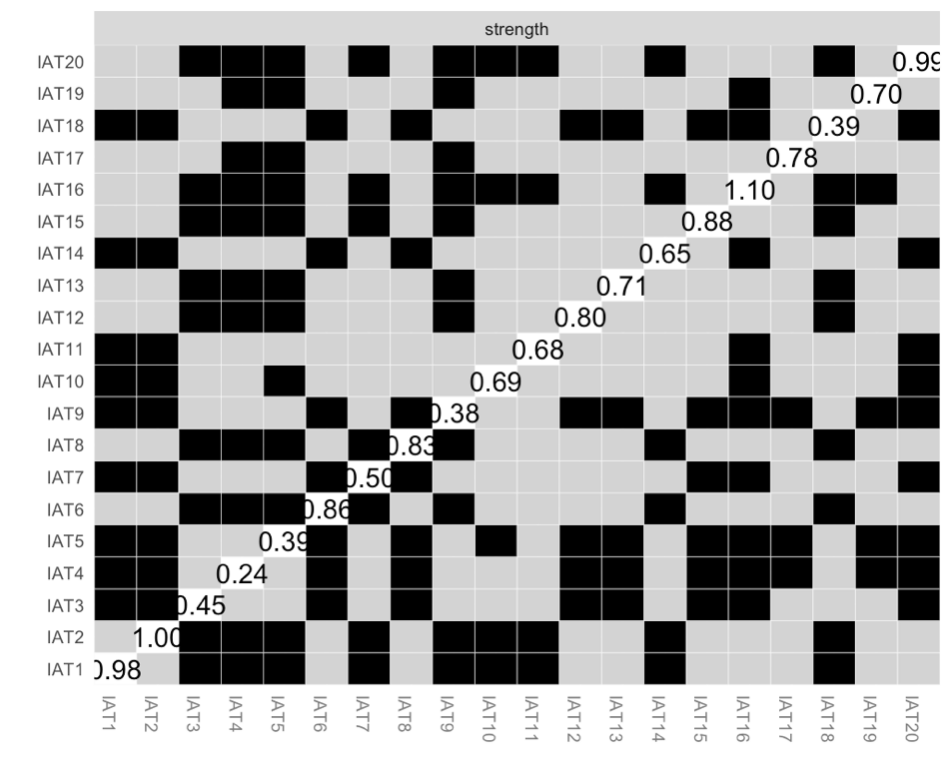


**Fig. 1.** Results of bootstrapped difference test for nodes of internet addiction network. The black grid indicates a significant difference between the two corresponding edge weights, and the gray grid indicates no significant difference.


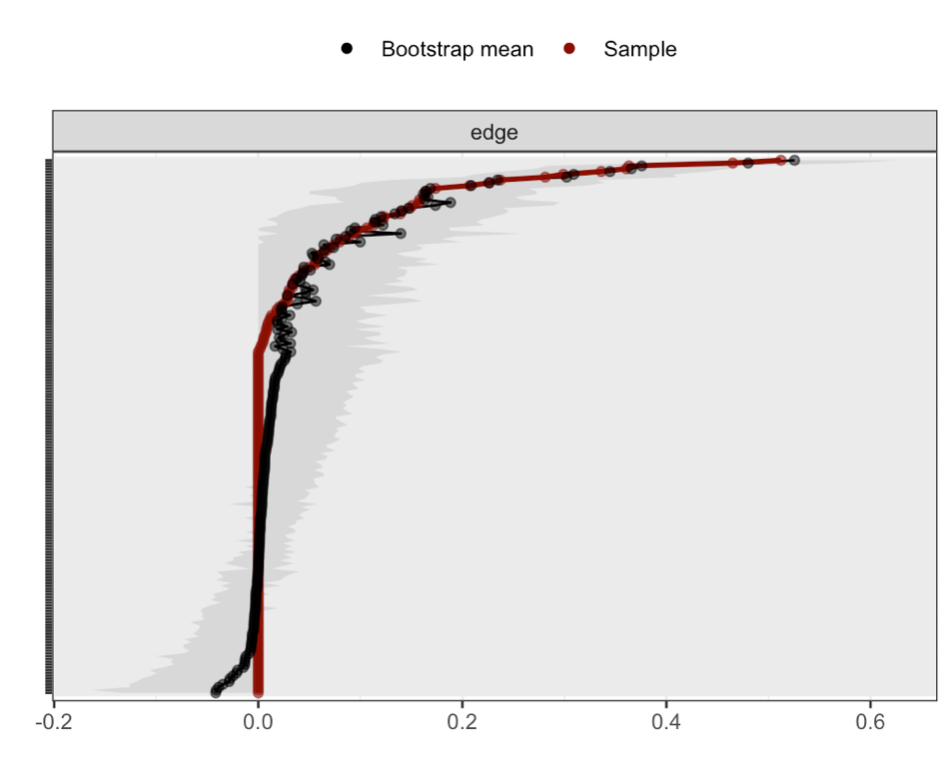


**Fig. 2.** Bootstrap analysis results of the edge weights of internet addiction network. The gray area represents the bootstrap 95% confidence interval (CIs), narrower CIs indicate reliable accuracy.


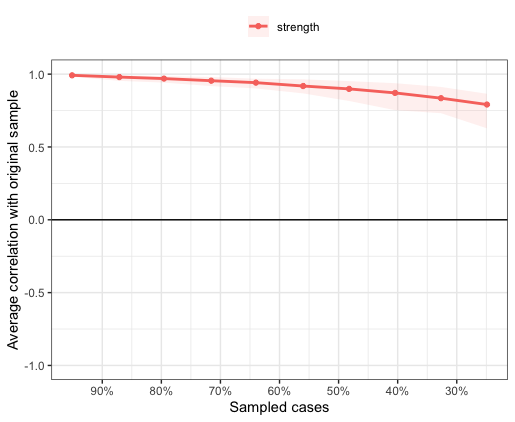


**Fig. 3.** Stability of strength by case dropping subset bootstrap of internet addiction network.


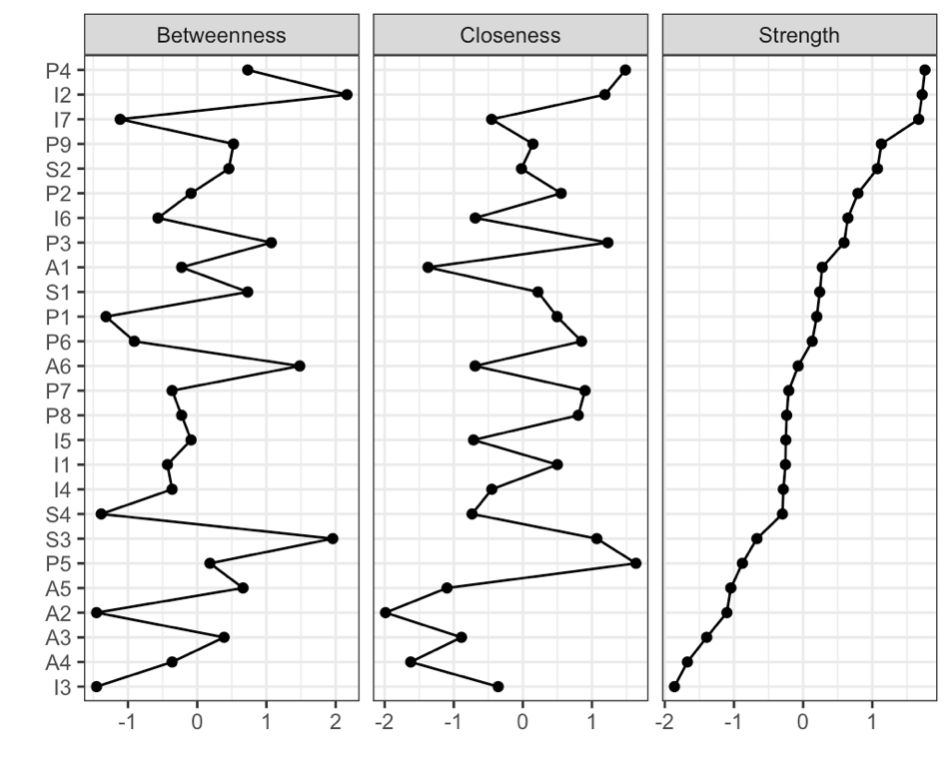


**Fig. 4.** Centrality indices of the network between internet addiction and mental disorders


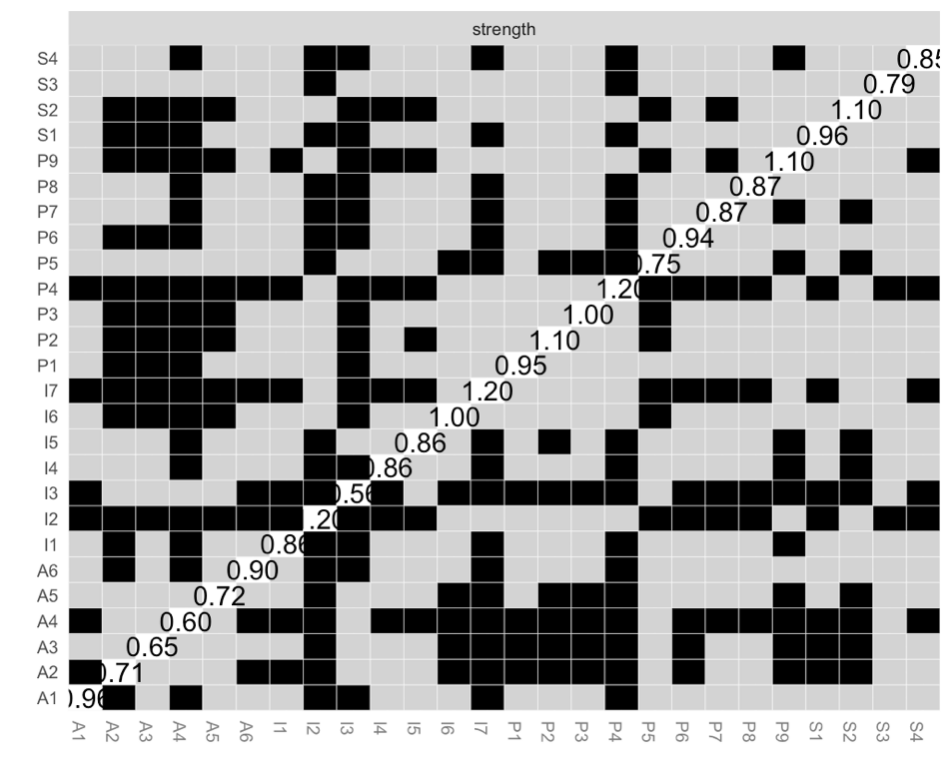


**Fig. 5.** Results of bootstrapped difference test for strength within the internet addiction-mental disorders network. The black grid indicates a significant difference between the two corresponding edge weights, and the gray grid indicates no significant difference.


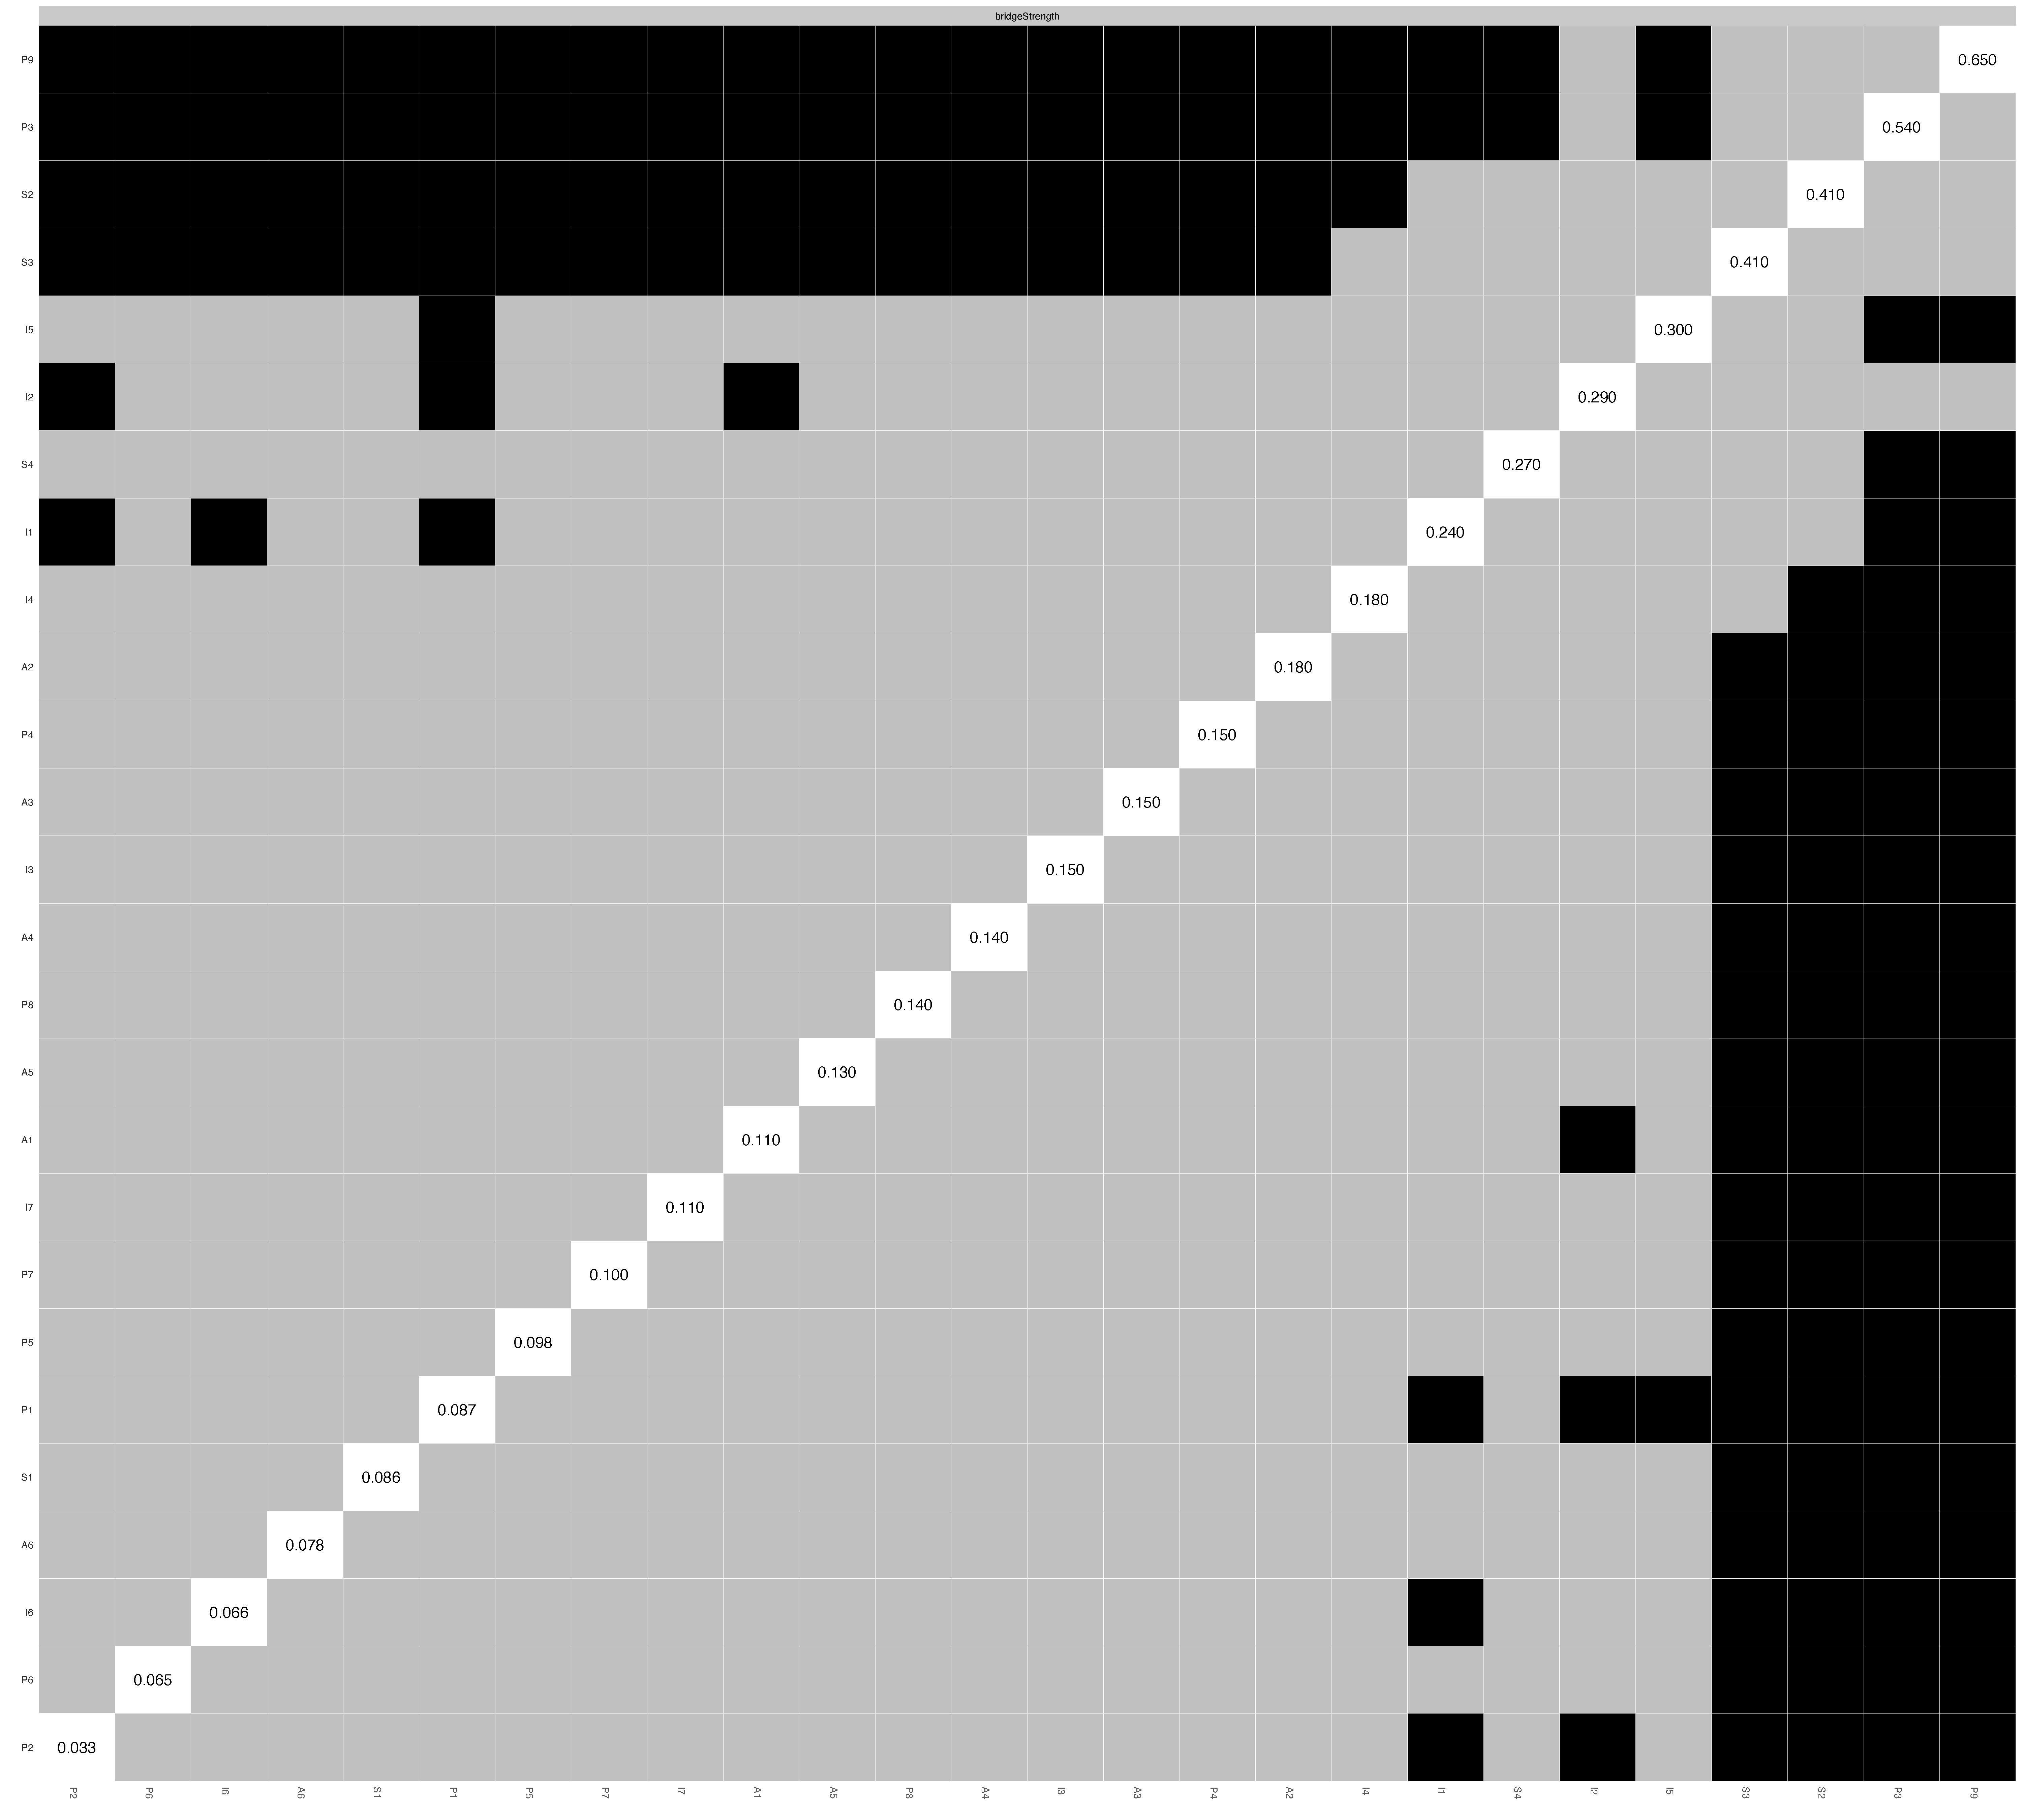


**Fig. 6.** Results of bootstrapped difference test for bridge strength within the internet addiction-mental disorders network. The black grid indicates a significant difference between the two corresponding edge weights, and the gray grid indicates no significant difference.


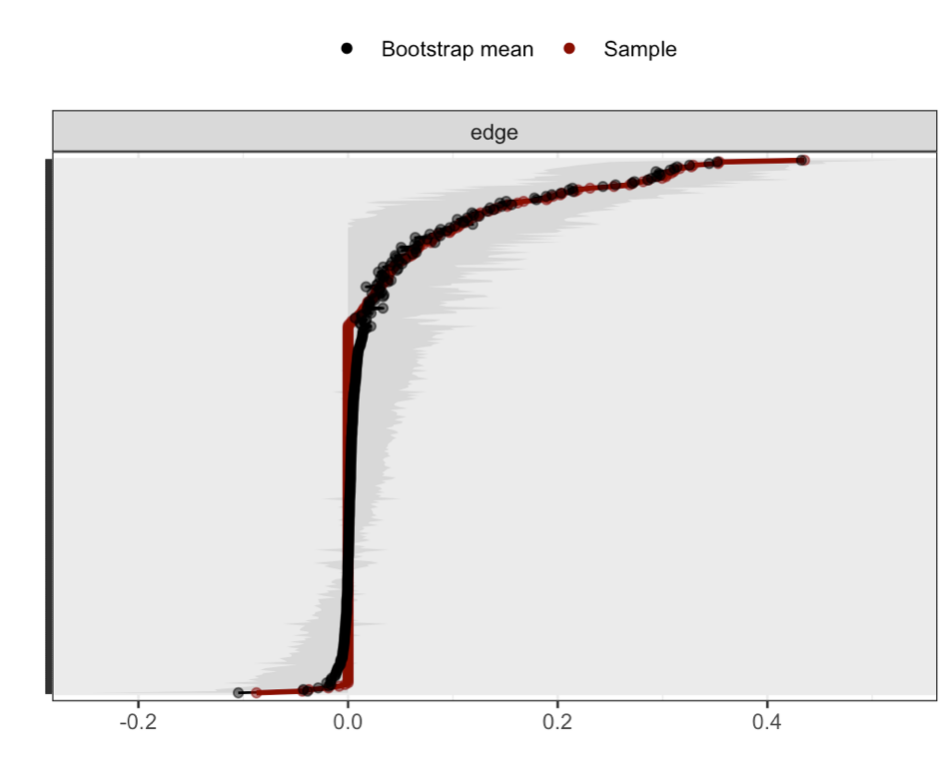


**Fig. 7.** Bootstrap analysis results of the edge weights within the internet addiction-mental disorders network. The gray area represents the bootstrap 95% confidence interval (CIs), narrower CIs indicate reliable accuracy.


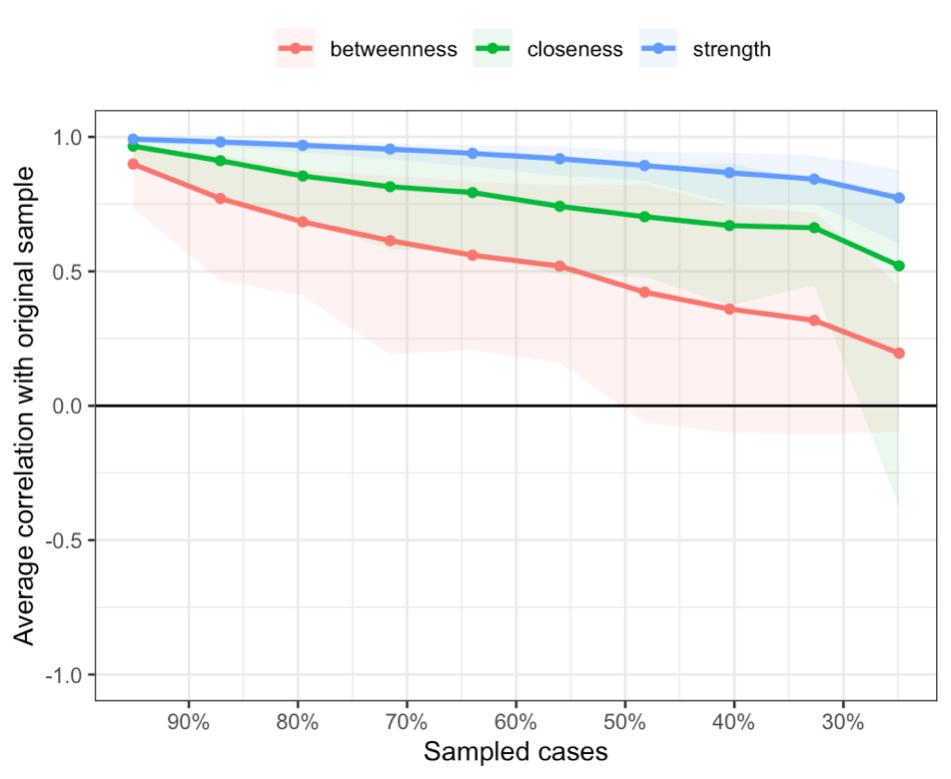


**Fig. 8.** Stability of centrality indices by case dropping subset bootstrap of internet addiction-mental disorders network.


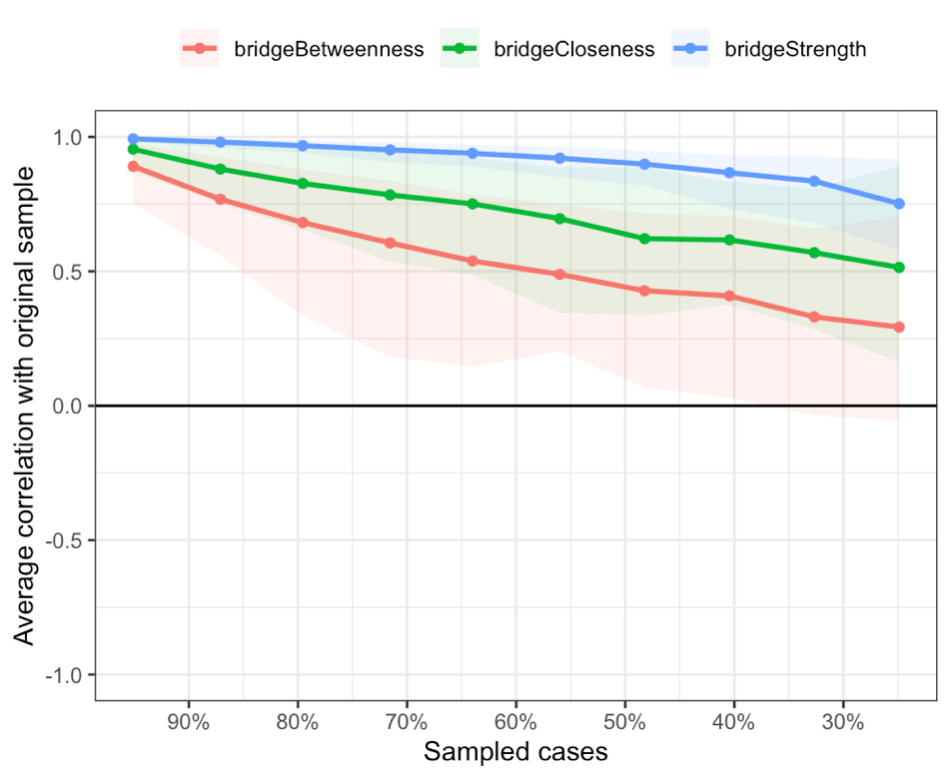


**Fig. 9.** Stability of bridge centrality indices by case dropping subset bootstrap of internet addiction-mental disorders network.
